# Supplementary material for: Multifunctional chiral metal hydrogen-bonded organic frameworks constructed from lanthanide ions with a trigonal prismatic coordination environment
Source: Royal Society of Chemistry journal article supplement (doi:10.1039/d4dt02131b), 2024-11-05
Supplement: d4dt02131b1.pdf [file d4dt02131b1.pdf]

Supporting information for  
**Multifunctional chiral metal hydrogen-bonded organic  
frameworks constructed from lanthanide ions with trigonal  
prismatic coordination environment**

Guo Peng,<sup>\*a</sup> Guo-Xing Zhou,<sup>a</sup> Xiang-Tao Dong,<sup>a</sup> Yong-Bo Peng,<sup>a</sup> Rong-Yan  
Zhang,<sup>a</sup> Ying-Zhao Ma,<sup>b</sup> and Xiao-Ming Ren<sup>\*ac</sup>

<sup>a</sup> State Key Laboratory of Materials-Oriented Chemical Engineering, School of  
Chemistry and Molecular Engineering, Nanjing Tech University, Nanjing 211816, P.  
R. China

<sup>b</sup> Chongqing Key Laboratory of Green Synthesis and Application, College of  
Chemistry, Chongqing Normal University, Chongqing 401331, China

<sup>c</sup> State Key Laboratory of Coordination Chemistry, Nanjing University, Nanjing  
210093, P. R. China

E-mail: guopeng@njtech.edu.cn, xmren@njtech.edu.cn

**Table S1** Crystallographic data and structure refinement for complexes **D-1**, **L-1**, **D-2**  
and **L-2**.

|                                             | <b>D-1</b>                                                                      | <b>L-1</b>                                                                      | <b>D-2</b>                                                                       | <b>L-2</b>                                                                       |
|---------------------------------------------|---------------------------------------------------------------------------------|---------------------------------------------------------------------------------|----------------------------------------------------------------------------------|----------------------------------------------------------------------------------|
| Formula                                     | C <sub>18</sub> H <sub>37</sub> DyN <sub>3</sub> O <sub>17</sub> P <sub>3</sub> | C <sub>18</sub> H <sub>37</sub> DyN <sub>3</sub> O <sub>17</sub> P <sub>3</sub> | C <sub>18</sub> H <sub>37</sub> N <sub>3</sub> O <sub>17</sub> P <sub>3</sub> Yb | C <sub>18</sub> H <sub>37</sub> N <sub>3</sub> O <sub>17</sub> P <sub>3</sub> Yb |
| <i>M<sub>r</sub></i> (g mol <sup>-1</sup> ) | 822.91                                                                          | 822.91                                                                          | 833.45                                                                           | 833.45                                                                           |
| Crystal system                              | Tetragonal                                                                      | Tetragonal                                                                      | Tetragonal                                                                       | Tetragonal                                                                       |
| Space group                                 | <i>P</i> 4 <sub>3</sub>                                                         | <i>P</i> 4 <sub>1</sub>                                                         | <i>P</i> 4 <sub>3</sub>                                                          | <i>P</i> 4 <sub>1</sub>                                                          |
| <i>T</i> (K)                                | 296                                                                             | 296                                                                             | 296                                                                              | 296                                                                              |
| <i>a</i> (Å)                                | 12.4345(3)                                                                      | 12.4378(3)                                                                      | 12.4178(7)                                                                       | 12.4055(9)                                                                       |
| <i>b</i> (Å)                                | 12.4345(3)                                                                      | 12.4378(3)                                                                      | 12.4178(7)                                                                       | 12.4055(9)                                                                       |
| <i>c</i> (Å)                                | 18.7179(11)                                                                     | 18.7219(10)                                                                     | 18.6104(11)                                                                      | 18.6422(14)                                                                      |

|                                             |              |              |              |              |
|---------------------------------------------|--------------|--------------|--------------|--------------|
| $\alpha$ (°)                                | 90           | 90           | 90           | 90           |
| $\beta$ (°)                                 | 90           | 90           | 90           | 90           |
| $\gamma$ (°)                                | 90           | 90           | 90           | 90           |
| $V$ (Å <sup>3</sup> )                       | 2894.1(2)    | 2896.3(2)    | 2869.8(4)    | 2869.0(3)    |
| $Z$                                         | 4            | 4            | 4            | 4            |
| $D_c$ (g cm <sup>-3</sup> )                 | 1.889        | 1.887        | 1.927        | 1.930        |
| $\mu$ (mm <sup>-1</sup> )                   | 2.829        | 2.827        | 3.508        | 3.509        |
| $F(000)$                                    | 1652         | 1652         | 1664         | 1668         |
| Reflns collected                            | 19262        | 30796        | 16775        | 15861        |
| Unique reflns                               | 4953         | 9243         | 4931         | 4768         |
| $R_{int}$                                   | 0.0559       | 0.0619       | 0.0579       | 0.0226       |
| GOF                                         | 1.042        | 1.055        | 1.022        | 1.325        |
| $R_1(I > 2\sigma)$                          | 0.0250       | 0.0356       | 0.0250       | 0.0221       |
| w $R_2$ (all data)                          | 0.0612       | 0.0754       | 0.0572       | 0.0813       |
| Max. diff. peak / hole (e Å <sup>-3</sup> ) | 1.068/-0.671 | 2.101/-1.424 | 0.858/-0.575 | 1.974/-0.965 |
| Flack parameter                             | 0.075(11)    | 0.040(9)     | 0.074(10)    | -0.008(3)    |

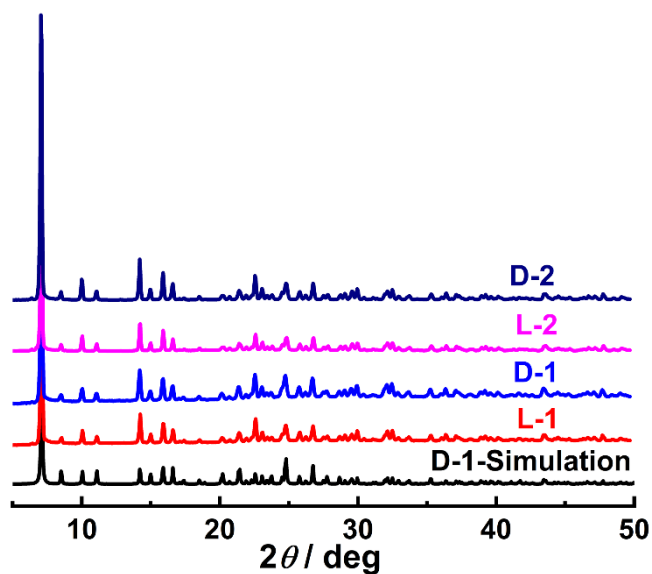

**Fig. S1** Measured and simulated PXRD patterns of complexes **D-1**, **L-1**, **D-2** and **L-2**.

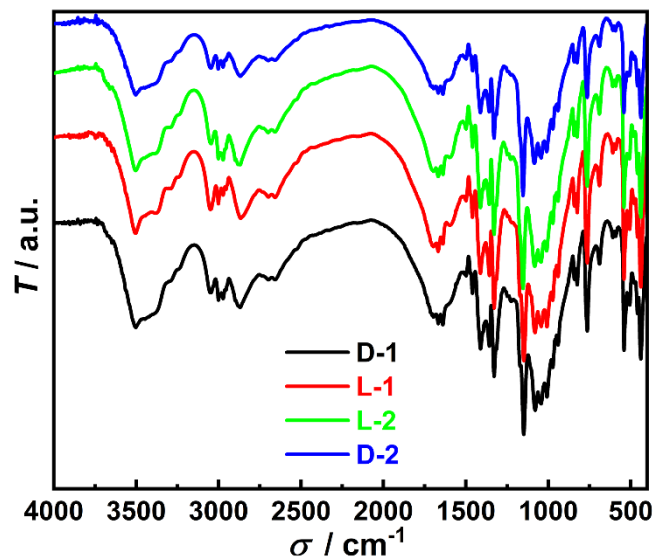

Fig. S2 IR spectra of complexes **D-1**, **L-1**, **D-2** and **L-2**.

**Table S2** Continuous shape measures (CShM) for complex **D-1**.

|              | <b>D-1</b>   |
|--------------|--------------|
| HP-6         | 32.793       |
| PPY-6        | 18.607       |
| OC-6         | 5.086        |
| <b>TPR-6</b> | <b>3.931</b> |
| JPPY-6       | 22.568       |

HP-6 = Hexagon, PPY-6 = Pentagonal pyramid, OC-6 = Octahedron, **TPR-6** = **Trigonal prism**, JPPY-6 = Johnson pentagonal pyramid J2

**Table S3** Selected bond lengths (Å) and angles (°) for **D-1**.

| <b>D-1</b>         |            |
|--------------------|------------|
| Dy(1)-O(1)         | 2.267(4)   |
| Dy(1)-O(2)#1       | 2.259(4)   |
| Dy(1)-O(6)         | 2.225(4)   |
| Dy(1)-O(7)#2       | 2.253(5)   |
| Dy(1)-O(1)#1       | 2.252(4)   |
| Dy(1)-O(12)#2      | 2.251(5)   |
| O(2)#1-Dy(1)-O(1)  | 87.79(16)  |
| O(6)-Dy(1)-O(1)    | 81.39(16)  |
| O(6)-Dy(1)-O(2)#1  | 111.39(17) |
| O(6)-Dy(1)-O(7)#2  | 85.80(17)  |
| O(6)-Dy(1)-O(1)#1  | 80.65(16)  |
| O(6)-Dy(1)-O(12)#2 | 155.99(17) |

|                      |            |
|----------------------|------------|
| O(7)#2-Dy(1)-O(1)    | 111.02(18) |
| O(7)#2-Dy(1)-O(2)#1  | 156.70(18) |
| O(1)#1-Dy(1)-O(1)    | 154.83(17) |
| O(1)#1-Dy(1)-O(2)#1  | 82.52(17)  |
| O(1)#1-Dy(1)-O(7)#2  | 85.07(19)  |
| O(12)#2-Dy(1)-O(1)   | 82.45(16)  |
| O(12)#2-Dy(1)-O(2)#1 | 85.54(18)  |
| O(12)#2-Dy(1)-O(7)#2 | 83.56(17)  |
| O(12)#2-Dy(1)-O(1)#1 | 119.63(17) |

Symmetry codes: #1 y, 1-x, 0.25+z; #2 1-y, x, -0.25+z.

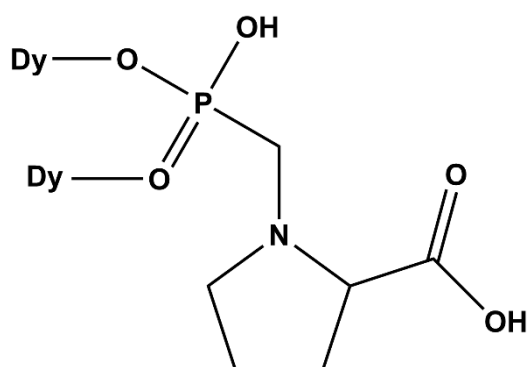

**Scheme S1** The coordination mode of PMP ligand in **D-1**.

**Table S4** Hydrogen bonds in **D-1**.

| D-H...A         | d(D-H)/ Å | d(H...A)/ Å | d(D...A)/ Å | <(DHA)/ ° |
|-----------------|-----------|-------------|-------------|-----------|
| N1-H1 ...O14    | 0.98      | 1.80        | 2.707(7)    | 153       |
| N2-H2 ...O4     | 0.98      | 1.95        | 2.852(7)    | 152       |
| O3-H3 ...O15    | 0.82      | 1.78        | 2.551(7)    | 156       |
| N3-H3A ...O9    | 0.98      | 1.87        | 2.774(7)    | 151       |
| O8-H8 ...O5     | 0.82      | 1.72        | 2.443(7)    | 146       |
| O13-H13 ...O10  | 0.82      | 1.73        | 2.438(7)    | 143       |
| O16-H16C ...O17 | 0.85      | 2.07        | 2.871(13)   | 156       |
| O16-H16D ...O5  | 0.85      | 2.18        | 2.957(9)    | 152       |
| O17-H17A ...O16 | 0.85      | 2.10        | 2.781(13)   | 137       |
| O17-H17B ...O10 | 0.85      | 2.45        | 3.005(10)   | 123       |
| C1-H1B ...O4    | 0.97      | 2.55        | 3.111(8)    | 117       |
| C4-H4B ...O13   | 0.97      | 2.37        | 3.324(9)    | 169       |
| C8-H8B ...O7    | 0.97      | 2.59        | 3.147(9)    | 117       |
| C11-H11 ...O15  | 0.98      | 2.57        | 3.420(8)    | 145       |
| C13-H13B ...O14 | 0.97      | 2.48        | 3.034(8)    | 116       |
| C14-H14B ...O12 | 0.97      | 2.55        | 3.016(9)    | 109       |

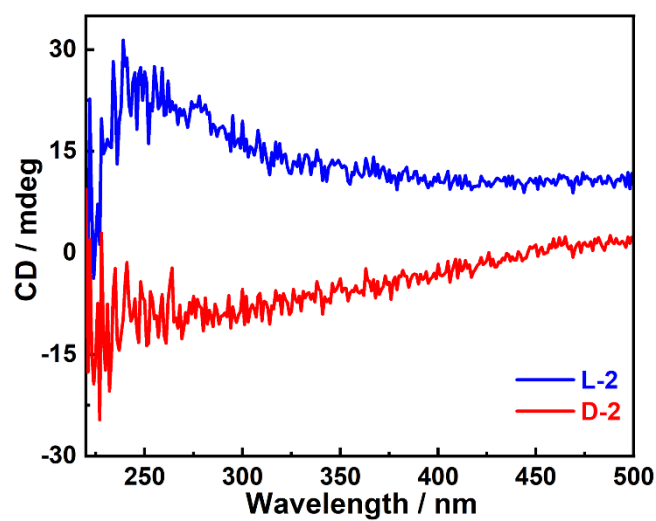

Fig. S3 CD spectra of complexes D-2 and L-2.

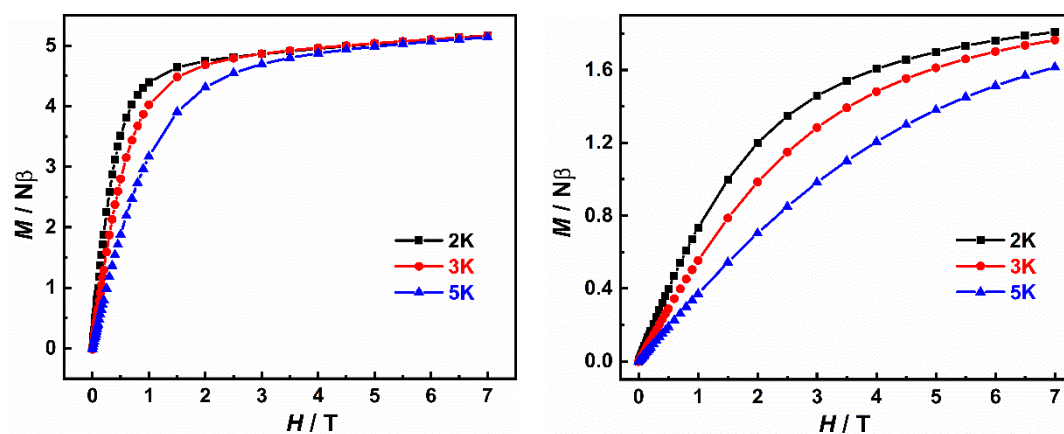

Fig. S4  $M$  vs.  $H$  plots for L-1 (left) and L-2 (right).

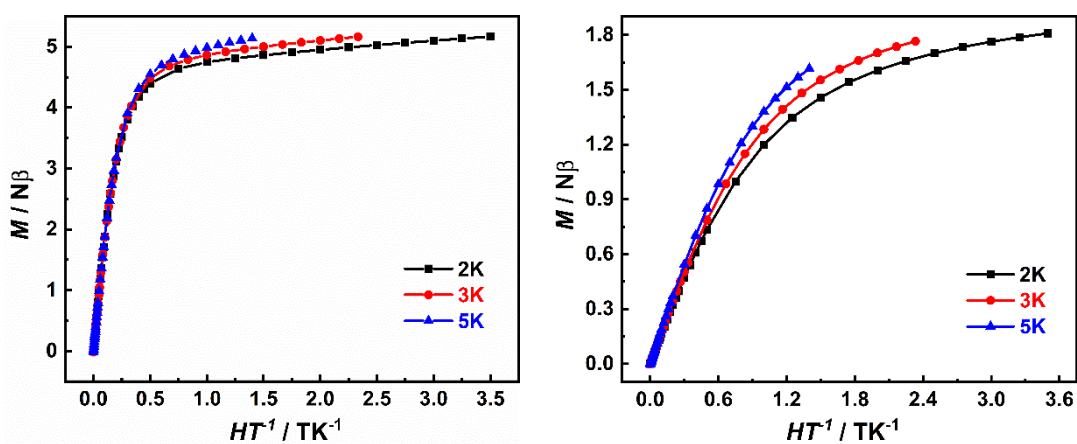

Fig. S5  $M$  vs.  $HT^{-1}$  plots for L-1 (left) and L-2 (right).

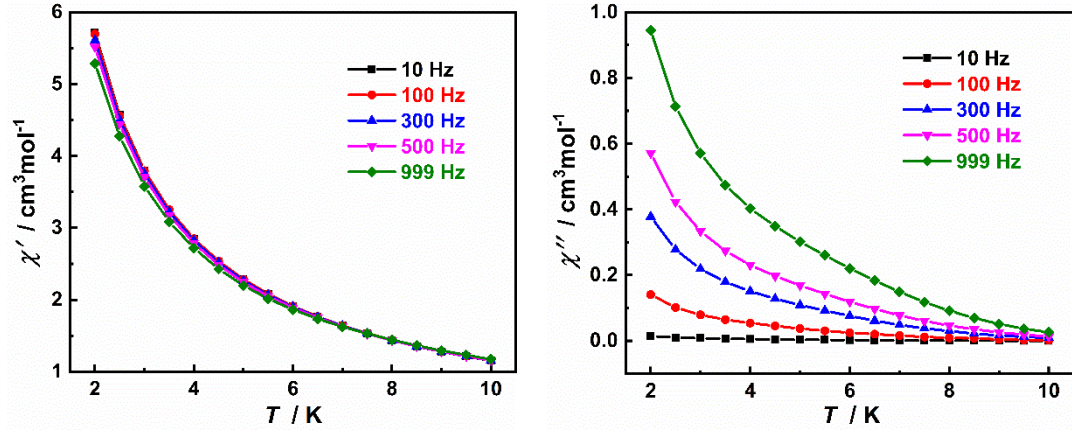

**Fig. S6** Temperature dependence of in-phase (left) and out-of-phase (right) ac susceptibility data at a zero dc field for L-1.

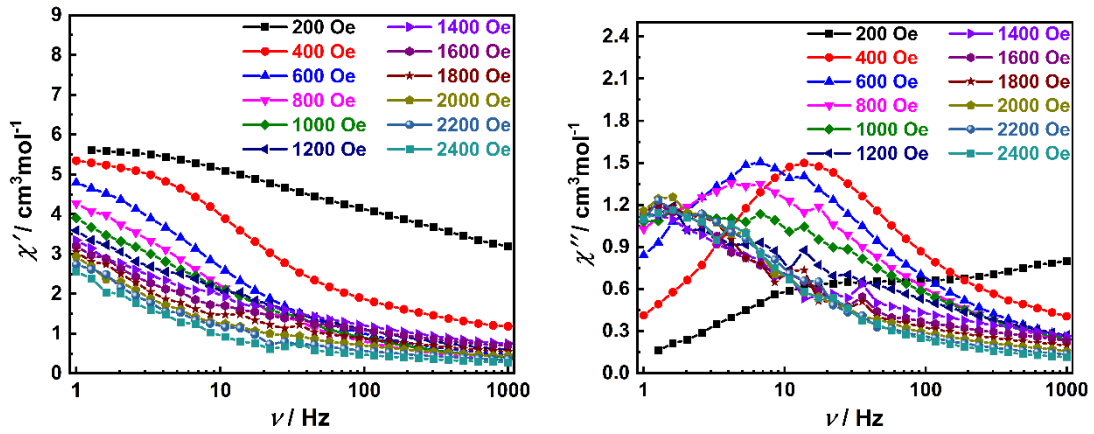

**Fig. S7** Frequency dependence of in-phase (left) and out-of-phase (right) ac susceptibility signals under different dc fields at 2K for L-1.

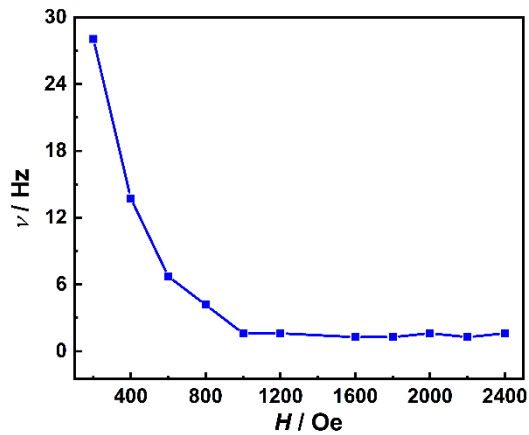

**Fig. S8** Field dependence of the characteristic frequency for L-1 at 2K.

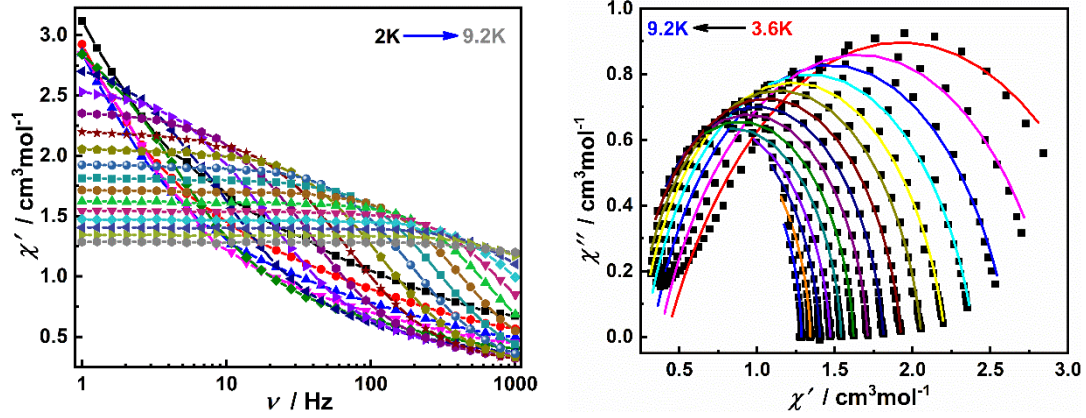

**Fig. S9** Frequency dependence of in-phase (left) ac susceptibility data under a 1600 Oe dc field for **L-1**. Cole–Cole plots for **L-1** (right). The solid lines are the best fits to a generalized Debye model.

**Table S5** Cole-Cole parameters of **L-1** at a 1600 Oe dc field.

| $T / \text{K}$ | $\chi_{\text{S}} / \text{cm}^3 \text{mol}^{-1}$ | $\chi_{\text{T}} / \text{cm}^3 \text{mol}^{-1}$ | $\tau / \text{s}$ | $\alpha$ | R        |
|----------------|-------------------------------------------------|-------------------------------------------------|-------------------|----------|----------|
| 3.6            | 4.17E-01                                        | 3.43E+00                                        | 3.63E-02          | 3.17E-01 | 1.04E-01 |
| 4              | 3.73E-01                                        | 2.94E+00                                        | 1.62E-02          | 2.48E-01 | 5.84E-02 |
| 4.4            | 3.26E-01                                        | 2.62E+00                                        | 7.86E-03          | 2.05E-01 | 2.68E-02 |
| 4.8            | 2.79E-01                                        | 2.40E+00                                        | 4.07E-03          | 1.76E-01 | 1.22E-02 |
| 5.2            | 2.47E-01                                        | 2.21E+00                                        | 2.23E-03          | 1.48E-01 | 6.90E-03 |
| 5.6            | 2.22E-01                                        | 2.06E+00                                        | 1.30E-03          | 1.26E-01 | 4.99E-03 |
| 6              | 1.96E-01                                        | 1.93E+00                                        | 7.91E-04          | 1.10E-01 | 3.48E-03 |
| 6.4            | 1.85E-01                                        | 1.81E+00                                        | 5.08E-04          | 9.36E-02 | 2.55E-03 |
| 6.8            | 1.79E-01                                        | 1.71E+00                                        | 3.40E-04          | 7.70E-02 | 2.38E-03 |
| 7.2            | 1.64E-01                                        | 1.62E+00                                        | 2.33E-04          | 6.52E-02 | 1.72E-03 |
| 7.6            | 1.46E-01                                        | 1.54E+00                                        | 1.63E-04          | 5.83E-02 | 1.50E-03 |
| 8              | 2.89E-02                                        | 1.47E+00                                        | 1.07E-04          | 7.61E-02 | 5.56E-03 |
| 8.4            | 1.18E-13                                        | 1.40E+00                                        | 7.66E-05          | 5.86E-02 | 8.38E-04 |
| 8.8            | 2.13E-13                                        | 1.34E+00                                        | 5.83E-05          | 4.01E-02 | 1.03E-03 |
| 9.2            | 8.01E-13                                        | 1.28E+00                                        | 4.59E-05          | 1.80E-02 | 1.33E-03 |

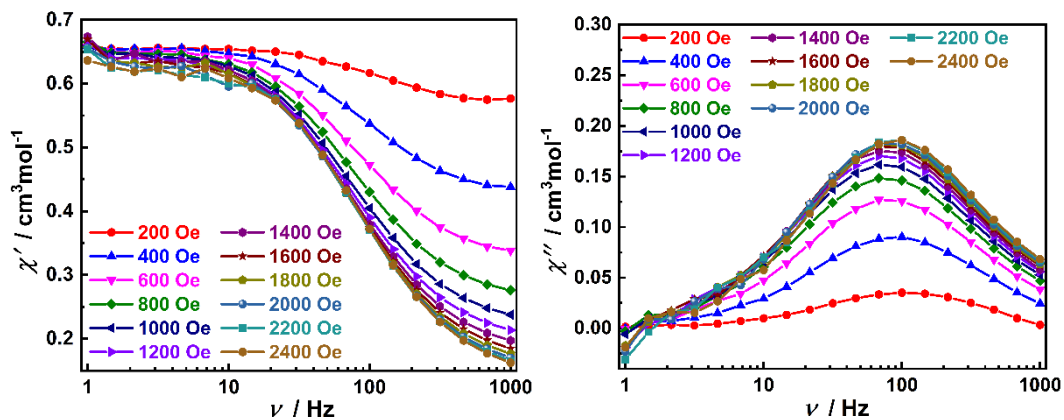

**Fig. S10** Frequency dependence of in-phase (left) and out-of-phase (right) ac susceptibility signals under different dc fields at 2 K for L-2.

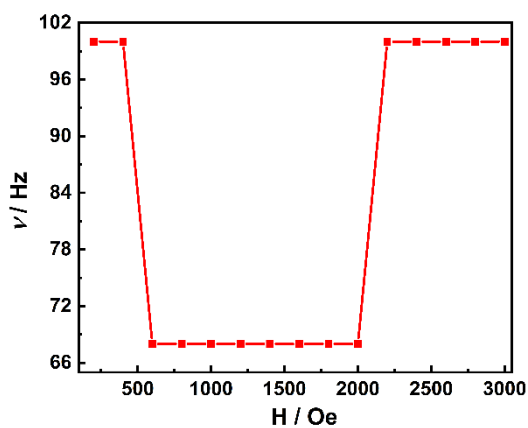

**Fig. S11** Field dependence of the characteristic frequency for L-2 at 2K.

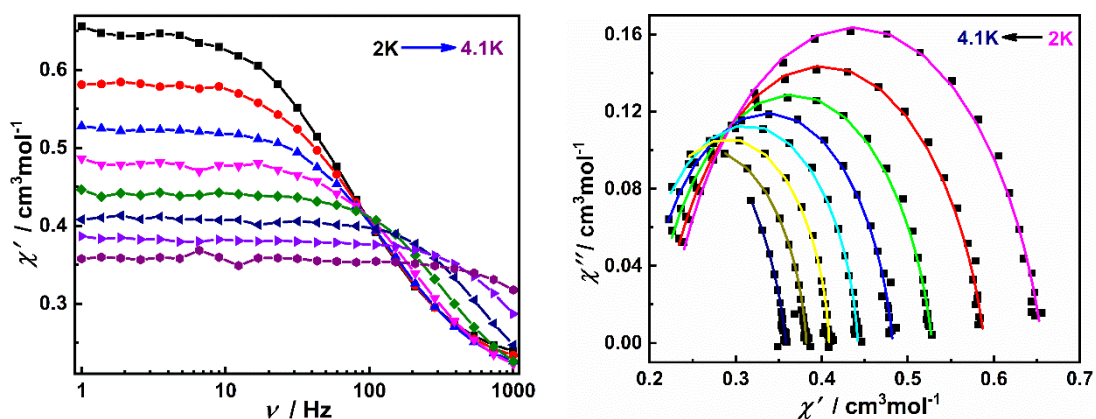

**Fig. S12** Frequency dependence of in-phase (left) ac susceptibility data under a 2000 Oe dc field for L-2. Cole–Cole plots for L-2 (right). The solid lines are the best fits to a generalized Debye model.



**Table S6** Cole-Cole parameters of **L-2** at a 2000 Oe dc field.

| $T / \text{K}$ | $\chi_s / \text{cm}^{-3}\text{mol}^{-1}$ | $\chi_T / \text{cm}^{-3}\text{mol}^{-1}$ | $\tau / \text{s}$ | $\alpha$ | R        |
|----------------|------------------------------------------|------------------------------------------|-------------------|----------|----------|
| 2              | 2.19E-01                                 | 6.56E-01                                 | 1.99E-03          | 1.81E-01 | 3.64E-04 |
| 2.3            | 2.12E-01                                 | 5.89E-01                                 | 1.51E-03          | 1.71E-01 | 5.71E-04 |
| 2.6            | 2.02E-01                                 | 5.28E-01                                 | 1.09E-03          | 1.49E-01 | 1.83E-04 |
| 2.9            | 1.92E-01                                 | 4.82E-01                                 | 7.47E-04          | 1.24E-01 | 3.88E-04 |
| 3.2            | 1.85E-01                                 | 4.42E-01                                 | 4.60E-04          | 8.23E-02 | 1.57E-04 |
| 3.5            | 1.73E-01                                 | 4.09E-01                                 | 2.57E-04          | 6.60E-02 | 1.32E-04 |
| 3.8            | 1.52E-01                                 | 3.82E-01                                 | 1.27E-04          | 8.71E-02 | 9.32E-05 |
| 4.1            | 4.19E-02                                 | 3.58E-01                                 | 3.65E-05          | 1.52E-01 | 4.44E-04 |

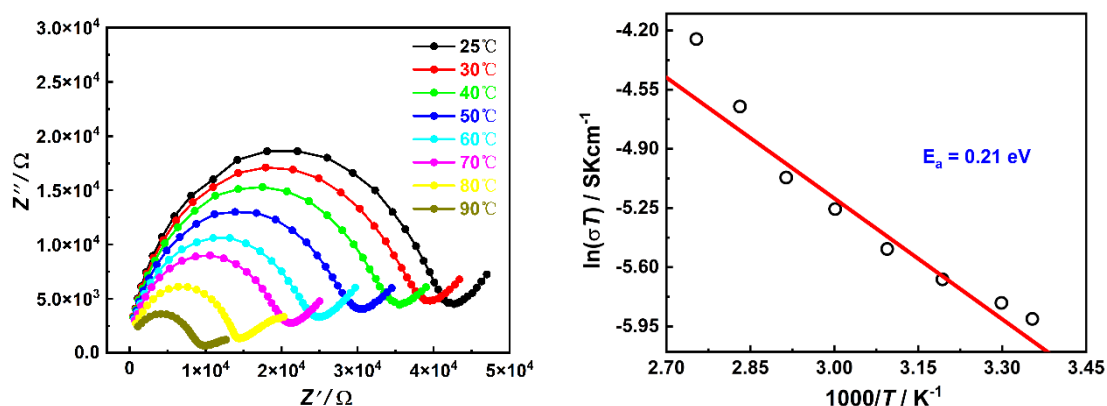

**Fig. S13** Nyquist plots of **D-1** at different temperatures under 98% relative humidity (left). The  $\ln(\sigma T)$  versus  $1000/T$  curve of **D-1** (right). The red solid lines are the best fit using the Arrhenius law.

**Table S7** The proton conductivity of **D-1**, **L-1** and **L-2** at 98% relative humidity under variable temperature ( $^{\circ}\text{C}$ ).

| Temperature / $^{\circ}\text{C}$ | $\sigma / \text{S cm}^{-1}$ ( <b>D-1</b> ) | $\sigma / \text{S cm}^{-1}$ ( <b>L-1</b> ) | $\sigma / \text{S cm}^{-1}$ ( <b>L-2</b> ) |
|----------------------------------|--------------------------------------------|--------------------------------------------|--------------------------------------------|
| 25                               | 9.13E-6                                    | 4.39E-6                                    | 2.71E-6                                    |
| 30                               | 9.87E-6                                    | 5.15E-6                                    | 2.88E-6                                    |
| 40                               | 1.09E-5                                    | 6.43E-6                                    | 3.53E-6                                    |
| 50                               | 1.27E-5                                    | 8.36E-6                                    | 4.32E-6                                    |
| 60                               | 1.56E-5                                    | 1.17E-5                                    | 5.01E-6                                    |
| 70                               | 1.83E-5                                    | 1.50E-5                                    | 7.13E-6                                    |
| 80                               | 2.70E-5                                    | 2.20E-5                                    | 9.09E-6                                    |
| 90                               | 3.92E-5                                    | 3.20E-5                                    | 1.30E-5                                    |

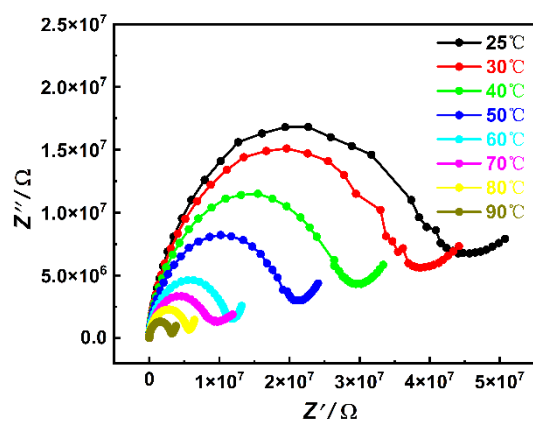

**Fig. S14** Nyquist plots of **D-1** at different temperatures under 75% relative humidity

**Table S8** The proton conductivity of **D-1** at 75% relative humidity under variable temperature (°C).

| Temperature / °C | $\sigma$ / S cm <sup>-1</sup> ( <b>D-1</b> ) |
|------------------|----------------------------------------------|
| 25               | 7.66E-9                                      |
| 30               | 8.73E-9                                      |
| 40               | 1.11E-8                                      |
| 50               | 1.59E-8                                      |
| 60               | 2.81E-8                                      |
| 70               | 3.47E-8                                      |
| 80               | 5.98E-8                                      |
| 90               | 1.05E-7                                      |
